# Supplementary material for: Design of Pt-Sn-Zn Nanomaterials for Successful Methanol Electrooxidation Reaction
Source: MDPI journal article supplement (doi:10.3390/ma16134617), 2023-06-27
Supplement: s1 [file s1]

## Supplementary 1

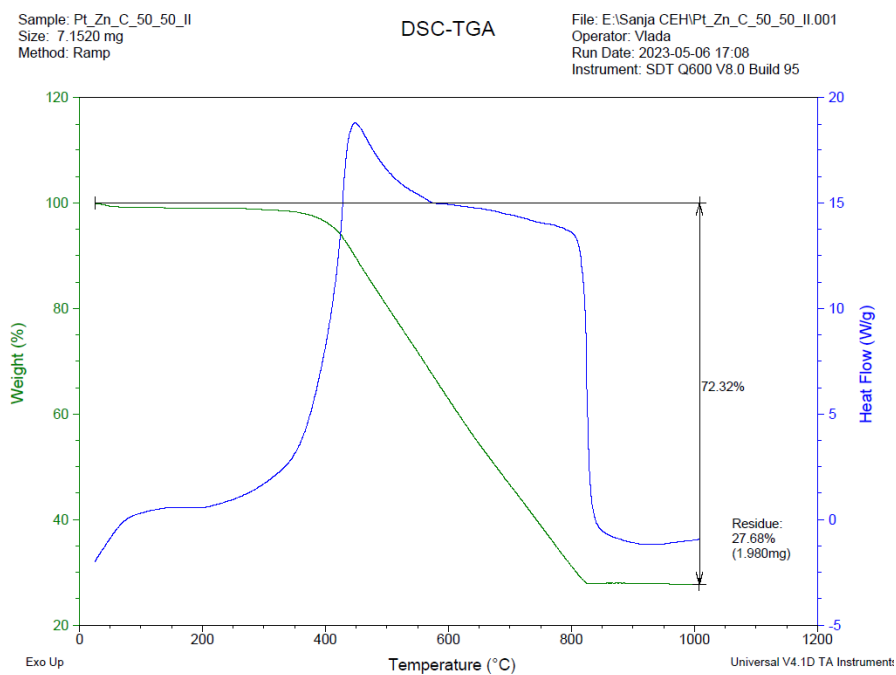

Fig S1. TGA curve for PtZn/C catalyst

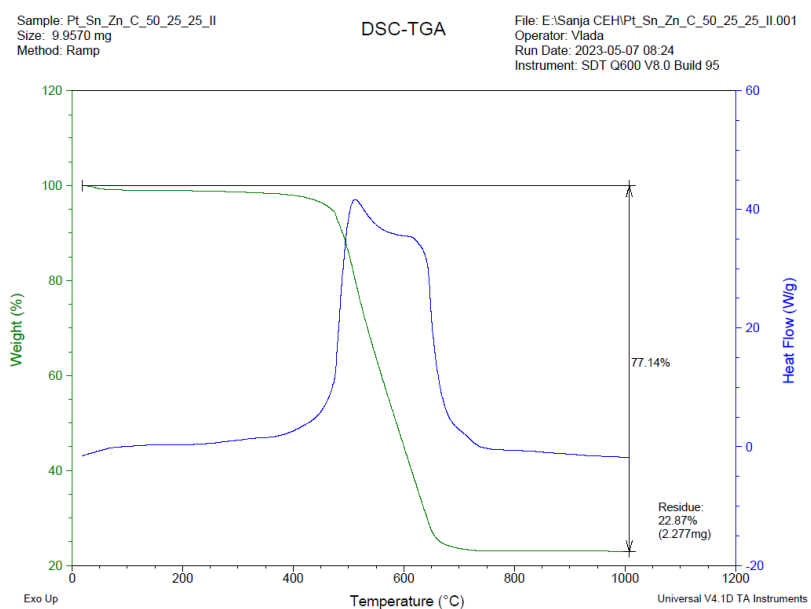

Fig S2. TGA curve for PtSnZn/C catalyst

Supplementary 2

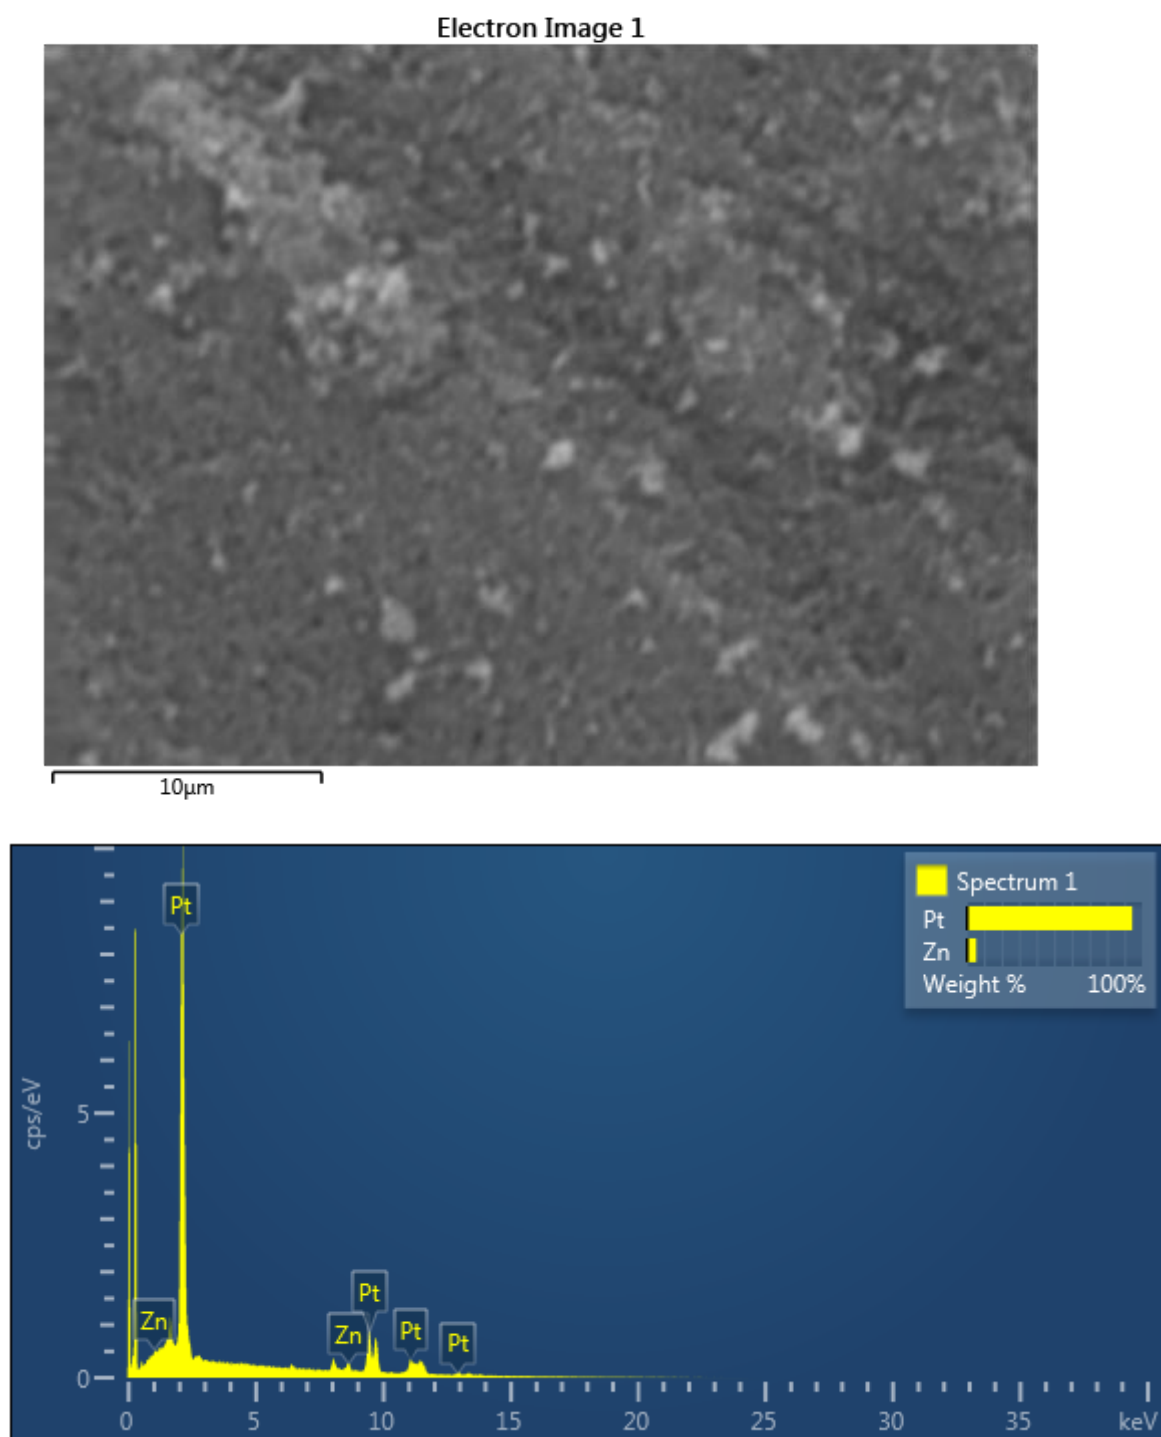

Fig S3. EDS analysis of PtZn/C catalysts

Electron Image 1

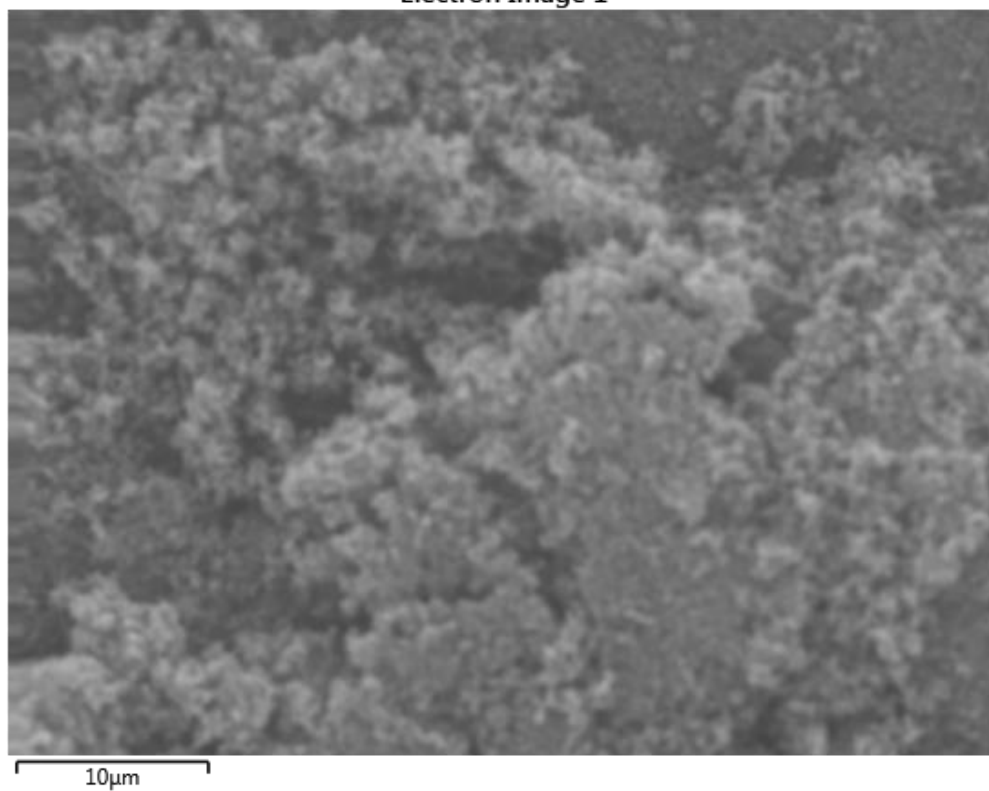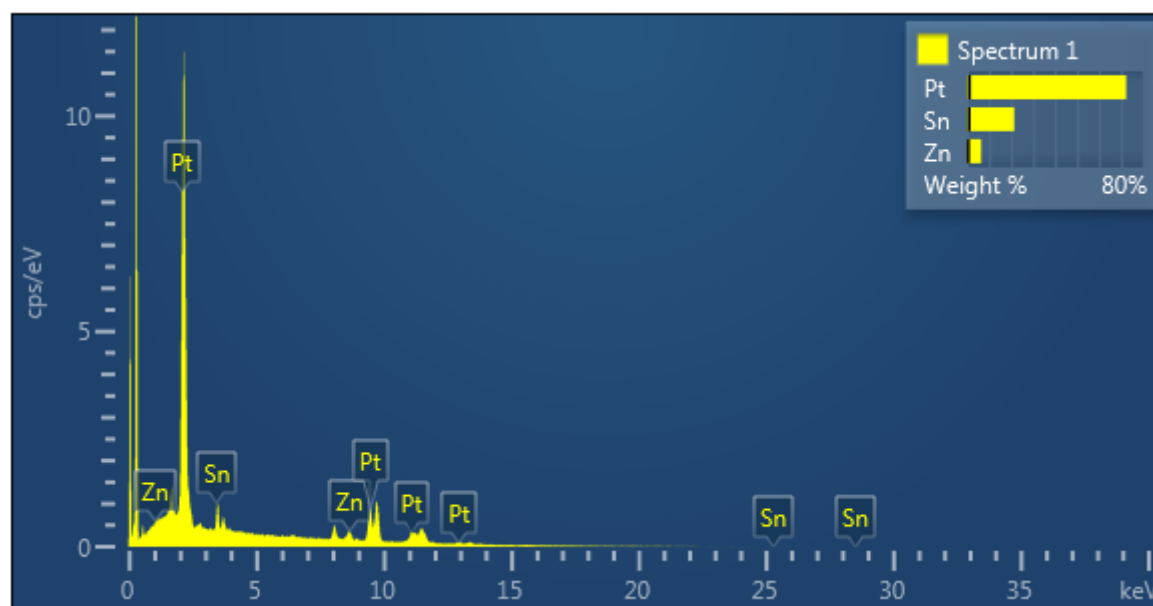

Fig S4. EDS analysis of PtSnZn/C catalysts
